# Supplementary material for: Palbociclib and ribociclib in breast cancer: consensus workshop on the management of concomitant medication
Source: PubMed Central journal article supplement — Ther Adv Med Oncol. 2019 May 10;11:1758835919833867. doi: 10.1177/1758835919833867 (PMC6535716; doi:10.1177/1758835919833867), 2019-05-10
Supplement: InhibCDK-Supplementary_Material_v2_01012019.pdf [file InhibCDK-Supplementary_Material_v2_01012019.pdf]

## Supplementary Material

**Table S1.** Category of drug inhibitors and inducers of cytochrome p-450.

|                                                     | <b>Strong inhibitor</b>                   | <b>Moderate inhibitor</b>                   | <b>Weak inhibitor</b>                          | <b>Strong inducer</b>                     | <b>Moderate inducer</b>                     | <b>Weak inducer</b>                         |
|-----------------------------------------------------|-------------------------------------------|---------------------------------------------|------------------------------------------------|-------------------------------------------|---------------------------------------------|---------------------------------------------|
| <b>Effect on the sensitive index substrate (SS)</b> | Increases the AUC of SS $\geq$ 5-fold     | Increases the AUC of SS $\geq$ 2 to <5-fold | Increases the AUC of SS $\geq$ 1.25 to <2-fold | Decreases the AUC of SS $\geq$ 80%        | Decreases the AUC of SS $\geq$ 50% to <80%, | Decreases the AUC of SS $\geq$ 20% to <50%, |
| <b>Clinical significance</b>                        | Monitoring toxicity                       | Monitoring toxicity                         | Low risk of DDI                                | Monitoring efficacy                       | Monitoring efficacy                         | Low risk of DDI                             |
| <b>Recommendations</b>                              | Consider decreasing the dose of substrate | Monitoring                                  | None                                           | Consider increasing the dose of substrate | Monitoring                                  | None                                        |

AUC: Area under the concentration-time curve; DDI: Drug-drug interaction.

Information about categorization of a particular drug can be obtained in several webpages <sup>1-3</sup>

**Table S2.** Membrane transporters involved in a possible DDI with palbociclib or ribociclib based on *in vitro* data <sup>1,3,4</sup>.

| Superfamilies                                                                         | Transporter                                                      | Organs                                                                            | Drug substrates                                                                                                                                         |
|---------------------------------------------------------------------------------------|------------------------------------------------------------------|-----------------------------------------------------------------------------------|---------------------------------------------------------------------------------------------------------------------------------------------------------|
| <b>SLC (uptake the drug into the cells)</b><br>(*except MATE 1/2 that is efflux pump) | <b>OATPB1/3:</b> Organic anion transporter polypeptide.          | Hepatocyte                                                                        | Pitavastatin, pravastatin, rosuvastatin, asunaprevir, atorvastatin, bosentan, cerivastatin, danoprevir, docetaxel, paclitaxel, repaglinide, simvastatin |
|                                                                                       | <b>OCT1:</b> Organic cation transporter                          | Hepatocyte and intestinal enterocyte                                              | Metformin                                                                                                                                               |
|                                                                                       | <b>OCT2:</b> Organic cation transporter                          | Kidney proximal tubule and neurons                                                | Metformin                                                                                                                                               |
|                                                                                       | <b>OAT1-3:</b> Organic anion transporter                         | Kidney                                                                            | Ciprofloxacin, adefovir, cefaclor, ceftizoxime, famotidine furosemide, ganciclovir, methotrexate, oseltamivir, penicillin G                             |
|                                                                                       | <b>MATE 1/2*:</b> multidrug and toxin extrusion protein          | Kidney and liver                                                                  | Metformin                                                                                                                                               |
| <b>ABC efflux pump (Take drugs out of the cells).</b>                                 | <b>Pgp:</b> MDR1(Multi Drug Resistance 1), P-glycoprotein, ABCB1 | Intestinal enterocytes, blood-brain barrier, hepatocyte, kidney proximal tubule   | Digoxin, dabigatran, colchicine                                                                                                                         |
|                                                                                       | <b>BCRP:</b> Breast Cancer Resistance Protein                    | Gastrointestinal tract, liver, kidney, brain, mammary tissue, testis and placenta | Rosuvastatin, pravastatin                                                                                                                               |
|                                                                                       | <b>BESP:</b> Bile salt export pump                               | Hepatocytes                                                                       | Pravastatin                                                                                                                                             |

SLC: Solute Carrier, ABC: ATP-binding cassette

**Table S3.** Equations used to correct QT duration according to heart rate

|                                         |                                     |
|-----------------------------------------|-------------------------------------|
| <b>Equation 1.</b><br>Bazett formula    | $QT_c(JT_c) = QT(JT)/RR^{1/2}$      |
| <b>Equation 2</b><br>Fridericia formula | $QT_c = QT/\sqrt[3]{RR}$            |
| <b>Equation 3</b><br>Framingham formula | $QT_c = QT + 0.154 \times (1 - RR)$ |

QT: Duration of QT in milliseconds. RR: Duration of RR interval in seconds.

**Table S4.** Antidepressant drugs according to their mechanism of action <sup>5</sup>.

| Type of Antidepressant                                          | Mechanism of action/Toxicity                                                                                                                                         | Drugs                                                                     |
|-----------------------------------------------------------------|----------------------------------------------------------------------------------------------------------------------------------------------------------------------|---------------------------------------------------------------------------|
| <b>Tricyclic Antidepressants (TCAs)</b>                         | Reuptake inhibition of serotonin and noradrenaline plus antihistaminic, antimuscarinic and anti-alpha 1 actions                                                      | Clomipramine, Imipramine, Amitriptyline                                   |
| <b>Monoamine Oxidase Inhibitors (MAOIs)</b>                     | Inhibition of monoamine oxidase enzymatic activity and increase availability of serotonin, noradrenaline and dopamine                                                | Fenelzine, Tranicipromine<br>Moclobemide, Selegiline                      |
| <b>Selective Serotonin Reuptake Inhibitors (SSRIs)</b>          | Inhibition of serotonin reuptake                                                                                                                                     | Citalopram, Escitalopram, Fluoxetine, Fluvoxamine, Paroxetine, Sertraline |
| <b>Serotonin and Noradrenaline Reuptake Inhibitors (SNRIs)</b>  | Inhibition of serotonin and noradrenaline reuptake                                                                                                                   | Venlafaxine, Desvenlafaxine, Duloxetine, Minalcipran                      |
| <b>Noradrenaline Reuptake Inhibitors</b>                        | Inhibition of noradrenaline reuptake and of G protein-coupled inwardly-rectifying potassium channels                                                                 | Reboxetine                                                                |
| <b>Noradrenergic and Specific Serotonergic</b>                  | Blockade of presynaptic alpha-2 adrenergic inhibitory autoreceptor and blockade specific postsynaptic serotonergic 5-HT <sub>2</sub> and 5-HT <sub>3</sub> receptors | Mirtazapine                                                               |
| <b>Selective Dopamine and Noradrenaline Reuptake Inhibitors</b> | Release dopamine and noradrenaline and inhibit reuptake; non-competitive antagonism on nicotinic receptors                                                           | Bupropion                                                                 |
| <b>Serotonin Antagonist and Reuptake Inhibitors</b>             | Blockade postsynaptic serotonergic 5-HT <sub>2A</sub> receptor and reuptake of serotonin, noradrenaline and dopamine; antagonism alpha-1 adrenergic receptor         | Trazodone<br>Nefazodone (not available in Spain)                          |
| <b>Serotonin Modulators</b>                                     | Agonists, partial agonists or pure antagonists of serotonergic receptors<br><br>Inhibition of serotonin reuptake                                                     | Vortioxetine<br>Vilazodone                                                |
| <b>Melatonin Agonist M1 and M2 Receptors</b>                    | M1 and M2 receptor agonist activity                                                                                                                                  | Agomelatine                                                               |
| <b>Psychostimulants</b>                                         | Inhibition of dopamine and noradrenaline reuptake                                                                                                                    | Methylphenidate                                                           |

Agomelatine is not indicated due to liver toxicity; reboxetine has DDIs with palbociclib and ribociclib via CYP3A4 and increases blood pressure at higher doses; bupropion decreases the convulsive threshold, may decrease tamoxifen efficacy via inhibition of CYP2D6 and can provoke insomnia and headache.

**Table S5.** Incidence of neutropenia in palbociclib and ribociclib breast cancer trials.

| <b>Neutropenia<br/>as adverse event</b> | <b>Palbociclib/Ribociclib Arm</b> |                 |                    |                | <b>Placebo Arm</b>    |                 |                    |                    |
|-----------------------------------------|-----------------------------------|-----------------|--------------------|----------------|-----------------------|-----------------|--------------------|--------------------|
|                                         | <b>All<br/>Grades</b>             | <b>Grade1-2</b> | <b>Grade<br/>3</b> | <b>Grade 4</b> | <b>All<br/>Grades</b> | <b>Grade1-2</b> | <b>Grade<br/>3</b> | <b>Grade<br/>4</b> |
| <b>PALOMA-3<sup>6</sup></b>             | 81%                               | 16%             | 55%                | 10%            | 4%                    | 3%              | 0                  | 1%                 |
| <b>PALOMA-2<sup>7</sup></b>             | 81.8%                             | 12.7%           | 57.4%              | 11.7%          | 6%                    | 4.6%            | 0.9%               | 0.5%               |
| <b>MONALEESA-2<sup>8</sup></b>          | 76.9%                             | 14.9%           | 52.4%              | 9.6%           | 5.8%                  | 4.6%            | 1.2%               | 0%                 |
| <b>MONALEESA-7<sup>9</sup></b>          | 76%                               | 15%             | 51%                | 10%            | 8%                    | 4%              | 3%                 | 1%                 |
| <b>MONALEESA-3<sup>10</sup></b>         | 69.6%                             | 16.2%           | 46.6%              | 6.8%           | 2.1%                  | 2.1%            | 0%                 | 0%                 |
| <b>ComplEEment*</b>                     | 47.3%                             | 14.2%           | 29.4%              | 3.7%           | NA                    | NA              | NA                 | NA                 |

Treatment in PALOMA trials: Palbociclib 125 mg 3weeks on/1 week off. Two dose reductions permitted: to 100 and 75 mg, respectively. Treatment in MONALEESA trials: Ribociclib 600 mg 3weeks on/1 week off. Two dose reductions permitted: to 400 and 200 mg, respectively.

\*Preliminary results<sup>11</sup>: Data from the first 1,008 first enrolled patients who completed 56 days of follow-up or discontinued study before the cut-off date (October, 3, 2017). So, lower reported incidence rates can be due to short follow-up; NR: Not reported; NA: Not applicable.

**Table S6.** Infections in ribociclib and palbociclib randomized breast cancer trials.

| <b>Infection as<br/>adverse events</b> | <b>Palbociclib/Ribociclib Arm</b> |                 |                    |                    | <b>Placebo Arm</b>    |                 |                    |                |
|----------------------------------------|-----------------------------------|-----------------|--------------------|--------------------|-----------------------|-----------------|--------------------|----------------|
|                                        | <b>All<br/>Grades</b>             | <b>Grade1-2</b> | <b>Grade<br/>3</b> | <b>Grade<br/>4</b> | <b>All<br/>Grades</b> | <b>Grade1-2</b> | <b>Grade<br/>3</b> | <b>Grade 4</b> |
| <b>PALOMA-3<sup>12</sup></b>           | 51%                               | 48%             | 2%                 | 1%                 | 39%                   | 36%             | 3%                 | 0%             |
| <b>PALOMA-2<sup>12</sup></b>           | 59%                               | 53%             | 6%                 | 0%                 | 42%                   | 37.5%           | 4.5%               | 0%             |
| <b>MONALEESA-2<sup>13</sup></b>        | 50%                               | 35.8%           | 3.6%               | 0.6%               | 42%                   | 39.8%           | 2.1%               | 0.3%           |
| <b>MONALEESA-7<sup>9</sup></b>         | 47%                               | 43%             | 4%                 | 0%                 | 37%                   | 36%             | 1%                 | 0%             |

Infections were not included in the table of frequent adverse events of the MONALEESA-3 and ComplEEment trials; in those studies, cut-off for including adverse events was 15% and 5%, respectively <sup>14,15</sup>.

**Table S7:** Frequency of liver abnormalities in the MONALEESA-2, MONALEESA-7 and MONALEESA-3 trials.

| MONALEESA-2<br>Adverse Event (%) | Ribociclib plus Letrozole<br>N=334                       |         |         | Placebo plus Letrozole<br>N=334                                |         |         | Reference<br>(M follow-up)                                      |
|----------------------------------|----------------------------------------------------------|---------|---------|----------------------------------------------------------------|---------|---------|-----------------------------------------------------------------|
|                                  | All Grades                                               | Grade 3 | Grade 4 | All Grades                                                     | Grade 3 | Grade 4 |                                                                 |
| AST increased                    | 15.6                                                     | 7.5     | 1.8     | 3.9                                                            | 1.2     | 0       | Ref. <sup>13</sup><br><br>1 <sup>ary</sup> analysis<br>(15.3 m) |
| ALT increased                    | 15.0                                                     | 4.8     | 0.9     | 3.6                                                            | 1.2     | 0       |                                                                 |
| Abnormal LFTs                    | 20.1                                                     | 8.4     | 1.8     | 6.4                                                            | 2.4     | 0       | Update analysis<br>Ref. <sup>8</sup><br>(26m)                   |
| MONALEESA-7<br>Adverse Event (%) | Ribociclib plus Goserelin<br>plus Tamoxifen or Letrozole |         |         | Placebo plus Goserelin<br>plus Tamoxifen or Letrozole<br>N=334 |         |         | Reference<br>(M follow-up)                                      |
|                                  | All Grades                                               | Grade 3 | Grade 4 | All Grades                                                     | Grade 3 | Grade 4 |                                                                 |
| AST increased                    | 12.8                                                     | 5.4     | 0       | 7.4                                                            | 1.5     | 0       | Ref. <sup>9</sup><br><br>1 <sup>ary</sup> analysis<br>(19.2m)   |
| ALT increased                    | 11.9                                                     | 3.6     | 0       | 8.9                                                            | 1.2     | 0       |                                                                 |
| MONALEESA-3<br>Adverse Event (%) | Ribociclib plus Fulvestrant<br>N=483                     |         |         | Placebo plus Fulvestrant<br>N=241                              |         |         | Reference<br>(M follow-up)                                      |
|                                  | All Grades                                               | Grade 3 | Grade 4 | All Grades                                                     | Grade 3 | Grade 4 |                                                                 |
| AST increased                    | 15                                                       | 7       | 2       | 5                                                              | <1      | 0       | Ref. <sup>10</sup><br><br>1 <sup>ary</sup> analysis<br>(20.4 m) |
| ALT increased                    | 15                                                       | 5       | 1       | 5                                                              | <1      | 0       |                                                                 |

M: Median; m= months, AST: Aspartate Aminotransferase; ALT: Alanine Aminotransferase; LFTs: Liver function tests; 1<sup>ary</sup>: Primary

**Table S8.** G3/4 liver toxicity in ribociclib arm of MONALEESA-2: Summary of the 37 reported cases according to FDA review <sup>16</sup>.

| Adverse event                                                                                                               | Frequency N (%)    | Duration of G3 toxicity (range in days)                                                      | Management of ribociclib and outcome                                                                                                                                                                                                                                                                                                                                                                                                                                                                                                                                        |
|-----------------------------------------------------------------------------------------------------------------------------|--------------------|----------------------------------------------------------------------------------------------|-----------------------------------------------------------------------------------------------------------------------------------------------------------------------------------------------------------------------------------------------------------------------------------------------------------------------------------------------------------------------------------------------------------------------------------------------------------------------------------------------------------------------------------------------------------------------------|
| <b>G3 increase of both AST and ALT</b>                                                                                      | <b>16 (43.2%)*</b> | ALT:10-72+<br>AST: 9-79+<br>Overall, longer duration of G3 ALT toxicity than G3 AST toxicity | <ul style="list-style-type: none"> <li>• <b>Interruption:</b>5 patients; 3 in recovery, 2 recovered</li> <li>• <b>Withdrawal:</b> 6 patients; 2 not recovered**, 1 of them considered SAE; 4 in recovery</li> <li>• <b>Dose reduction:</b> 3 patients; 2 in recovery, 1 recovered</li> <li>• <b>Not changed:</b> 2 patients not recovered</li> </ul>                                                                                                                                                                                                                        |
| <b>Only G3 increase of ALT</b>                                                                                              | <b>11 (29.7%)</b>  | 12-56                                                                                        | <ul style="list-style-type: none"> <li>• <b>Interruption:</b> 3 patients; 2 recovered, 1 non- applicable</li> <li>• <b>Withdrawal:</b>4 patients; 1 recovered, 2 in recovery, 1 not recovered</li> <li>• <b>Dose Reduction:</b> 2 cases; both in recovery</li> <li>• <b>Not changed:</b> 2 not recovered (+28 days)</li> </ul>                                                                                                                                                                                                                                              |
| <b>G3 increase of AST, ALT and TB;</b><br>One with additional G3 elevation of AP<br>One with additional G3 elevation of GGT | <b>4 (10.8%)</b>   | >30                                                                                          | <ul style="list-style-type: none"> <li>• <b>3 cases considered SAEs</b> <ul style="list-style-type: none"> <li>○ 1 patient (with G3 elevation of Falc): Toxicity recovered, <b>no changes in dosage</b>, 2<sup>nd</sup> episode of G3 toxicity, not recovered</li> <li>○ 1 patient (with G3 elevation of GGT): <b>Interruption</b>, not recovered</li> <li>○ 1 (liver failure): <b>Withdrawal:</b> liver failure recovered, ALT not recovered at day +38</li> </ul> </li> <li>• 1 case not considered SAE: <b>Withdrawal</b>, at day 64 only bilirubin recovered</li> </ul> |
| <b>Hepatotoxicity (no specific toxicities mentioned)</b>                                                                    | <b>1 (0.3%)</b>    | 22                                                                                           | <ul style="list-style-type: none"> <li>• <b>Considered SAE</b></li> <li>• <b>Withdrawal:</b> In recovery</li> </ul>                                                                                                                                                                                                                                                                                                                                                                                                                                                         |
| <b>Only G3 increase of AST</b>                                                                                              | <b>1 (0.3%)</b>    | 15                                                                                           | <ul style="list-style-type: none"> <li>• Not changed, no dose reduction, recovered</li> </ul>                                                                                                                                                                                                                                                                                                                                                                                                                                                                               |
| <b>G3 elevation of ALT and AP</b>                                                                                           | <b>1 (0.3%)</b>    | 8                                                                                            | <ul style="list-style-type: none"> <li>• <b>Dose reduction:</b> In recovery</li> </ul>                                                                                                                                                                                                                                                                                                                                                                                                                                                                                      |
| <b>Only G3 elevation of AP</b>                                                                                              | <b>1 (0.3%)</b>    | 15                                                                                           | <ul style="list-style-type: none"> <li>• <b>No changes:</b> Recovered</li> </ul>                                                                                                                                                                                                                                                                                                                                                                                                                                                                                            |

SAE: Serious Adverse Event; AST: Aspartate Aminotransferase; ALT: Alanine Aminotransferase; AP: Alkaline Phosphatase; GGT: Gamma-Glutamyl Transferase; TB: Total Bilirubin; 1ary: Primary; ET: Endocrine Therapy  
TB: Total Bilirubin; \*Include one case of "elevation of liver enzymes" without specifications. \*\*Not recovered at the time of last assessment (period of assessment not always specified)

**Table S9.** Frequency of liver abnormalities in the PALOMA-1, PALOMA-2 and PALOMA-3 trials according to results presented at clinical.trials.gov and pivotal studies.

| PALOMA-1 Adverse Event (%) | Palbociclib plus Letrozole N=83 | Placebo plus Letrozole N=77 | Reference |
|----------------------------|---------------------------------|-----------------------------|-----------|
|----------------------------|---------------------------------|-----------------------------|-----------|

|                               | AEs                                   |         | SAEs    |  | AEs                               |         | SAEs    |  | (median follow-up)                                         |
|-------------------------------|---------------------------------------|---------|---------|--|-----------------------------------|---------|---------|--|------------------------------------------------------------|
| AST increased                 | 7.23                                  |         | 1.2     |  | 1.3                               |         | 0       |  | Ref. <sup>17</sup><br>(≈28m)                               |
| ALT increased                 | 7.23                                  |         | 1.2     |  | 1.3                               |         | 0       |  |                                                            |
| AP increased                  | 8.43                                  |         | 1.2     |  | 2.60                              |         | 0       |  |                                                            |
| GGT increased                 | 3.61                                  |         | 1.2     |  | 1.30                              |         | 0       |  |                                                            |
| PALOMA-2<br>Adverse Event (%) | Palbociclib plus Letrozole<br>N=444   |         |         |  | Placebo plus Letrozole<br>N=222   |         |         |  | Reference<br>(median follow-up)                            |
|                               | AEs                                   |         | SAEs    |  | AEs                               |         | SAEs    |  |                                                            |
| AST increased                 | 9.46                                  |         | 2       |  | 4.95                              |         | 0       |  | Ref. <sup>18</sup><br>1 <sup>ary</sup> analysis<br>(23 m)  |
| ALT increased                 | 9.68                                  |         | 3       |  | 4.05                              |         | 1       |  |                                                            |
| PALOMA-3<br>Adverse Event (%) | Palbociclib plus Fulvestrant<br>N=345 |         |         |  | Placebo plus Fulvestrant<br>N=172 |         |         |  | Reference<br>(M follow-up)                                 |
|                               | All grades                            | Grade 3 | Grade 4 |  | All Grades                        | Grade 3 | Grade 4 |  |                                                            |
| AST elevation                 | 6                                     | 2       | 0       |  | 5                                 | <1      | 0       |  | Ref. <sup>19</sup><br>1 <sup>ary</sup> analysis<br>(8.9 m) |
| ALT elevation                 | 7                                     | 3       | 0       |  | 5                                 | <1      | 0       |  |                                                            |
| LFTs*<br>abnormalities (%)    | Palbociclib plus ET<br>N=875          |         |         |  | Placebo plus ET<br>N=477          |         |         |  | Reference<br>(follow-up)                                   |
|                               | All grades                            |         | G3/4    |  | All grades                        |         | G3/4    |  |                                                            |
| ALT increased                 | 40.8                                  |         | 2.3     |  | 31.1                              |         | 0.2     |  | Ref. <sup>20</sup><br>Up to 50 m                           |
| AST increased                 | 48.4                                  |         | 3.3     |  | 40.8                              |         | 1.9     |  |                                                            |
| AP increased                  | 36.1                                  |         | NR      |  | 43.7                              |         | NR      |  |                                                            |
| TB increased                  | 7.9                                   |         | NR      |  | 6.0                               |         | NR      |  |                                                            |

M: Median; m: months; AEs: Adverse Events; SAEs: Serious Adverse Events; AST: Aspartate Aminotransferase; ALT: Alanine Aminotransferase; AP: Alkaline Phosphatase; GGT: Gamma-Glutamyl Transferase; TB: Total Bilirubin; 1<sup>ary</sup>: Primary; ET: Endocrine Therapy; NR: not reported

\*All grades: LFT elevations, including LFTs not considered AEs.

## References

- UpToDate Online [Internet]. Waltham, MA. 2018 [cited 2018 Jun 1]. Available from: <https://www.uptodate.com>
- Micromedex® (electronic version). Truven Health Analytics, Greenwood Village, Colorado, USA.
- Center for Drug Evaluation and Research. U.S. Food and Drug Administration. Drug Development and Drug Interactions: Table of Substrates, Inhibitors and Inducers [Internet]. Center for Drug Evaluation and Research; 2017 [cited 2018 Jun 1]. Available from: <https://www.fda.gov/drugs/developmentapprovalprocess/developmentresources/druginteractionslabeling/ucm080499.htm>
- Giacomini KM, Huang S, Tweedie DJ, Benet LZ. Membrane transporters in drug development. *Nature*. 2012;9(3):215–36.
- Grassi L, Nanni MG, Rodin G, Li M, Caruso R. The use of antidepressants in oncology: a review and practical tips for oncologists. *Ann Oncol Off J Eur Soc Med Oncol*. 2018 Jan;29(1):101–11.
- Cristofanilli M, Turner NC, Bondarenko I, Ro J, Im S-A, Masuda N, et al. Fulvestrant plus palbociclib

versus fulvestrant plus placebo for treatment of hormone-receptor-positive, HER2-negative metastatic breast cancer that progressed on previous endocrine therapy (PALOMA-3): final analysis of the multicentre, double-blind, phas. *Lancet Oncol*. 2016 Apr;17(4):425–39.

7. Rugo HS, Finn RS, Dieras V. Palbociclib (PAL)+ Letrozole (LET) as firstline therapy in estrogen receptor-positive (ER+)/human epidermal growth factor receptor 2-negative (HER2-) advanced breast cancer (ABC): efficacy and safety updates with longer follow-up across patient subgroups. In: San Antonio Breast Cancer Symposium. 2017.
8. Hortobagyi GN, Stemmer SM, Burris HA, Yap YS, Sonke GS, Paluch-Shimon S, et al. Updated results from MONALEESA-2, a phase III trial of first-line ribociclib plus letrozole versus placebo plus letrozole in hormone receptor-positive, HER2-negative advanced breast cancer. *Ann Oncol Off J Eur Soc Med Oncol*. 2018 Jul;29(7):1541–7.
9. Tripathy D, Im S-A, Colleoni M, Franke F, Bardia A, Harbeck N, et al. Ribociclib plus endocrine therapy for premenopausal women with hormone-receptor-positive, advanced breast cancer (MONALEESA-7): a randomised phase 3 trial. *Lancet Oncol*. 2018 May;19(7):904–15.
10. Slamon DJ, Neven P, Chia S, Fasching PA, De Laurentiis M, Im S-A, et al. Phase III Randomized Study of Ribociclib and Fulvestrant in Hormone Receptor-Positive, Human Epidermal Growth Factor Receptor 2-Negative Advanced Breast Cancer: MONALEESA-3. *J Clin Oncol*. 2018;36(24):2465–72.
11. DeLaurentiis M, Neven P, Jerusalem GHM, Bachelot TD, Jacot W, Dent SF, et al. Ribociclib+letrozole in patients with hormone receptor-positive (HR+), human epidermal growth factor receptor 2-negative (HER2-) advanced breast cancer (ABC) with no prior endocrine therapy for ABC:Preliminary results from the phase 3b CompleEement-1 trial. *J Clin Oncol*. 2018 May;36(15\_suppl):1056.
12. Committee for Medicinal Products for Human Use (CHMP). European Public Assessment Report: Palbociclib. EMA/652627/2016 [Internet]. 2016 [cited 2018 Jun 1]. Available from: [https://www.ema.europa.eu/documents/assessment-report/ibrance-epar-public-assessment-report\\_en.pdf](https://www.ema.europa.eu/documents/assessment-report/ibrance-epar-public-assessment-report_en.pdf)
13. Hortobagyi GN, Stemmer SM, Burris HA, Yap Y-S, Sonke GS, Paluch-Shimon S, et al. Ribociclib as First-Line Therapy for HR-Positive, Advanced Breast Cancer. *N Engl J Med*. 2016 Nov;375(18):1738–48.
14. Slamon DJ, Neven P, Chia S, Fasching PA, De Laurentiis M, Im SA, et al. Ribociclib (RIB) + fulvestrant (FUL) in postmenopausal women with hormone receptor-positive (HR+), HER2-negative (HER2 -) advanced breast cancer (ABC): Results from MONALEESA-3. *J Clin Oncol*. 2018 Jun;36((Suppl. Abst 1000)):Presented at 2018 ASCO Annual Meeting; June 1-5, 2.
15. DeLaurentiis M, Neven P, Jerusalem GHM, Bachelot TD, Jacot W, Dent SF, et al. Ribociclib (RIBO) + letrozole (LET) in patients (pts) with hormone receptor-positive (HR+), human epidermal growth factor receptor 2-negative (HER2-) advanced breast cancer (ABC) with no prior endocrine therapy (ET) for ABC: Preliminary results from the p. *J Clin Oncol*. 2018 May;36(15\_suppl):1056.
16. Center for Drug Evaluation and Research. NDA/BLA Multi-disciplinary Review and Evaluation NDA 209092 KISQALI (ribociclib) [Internet]. 2017 [cited 2018 Jun 1]. Available from: [https://www.accessdata.fda.gov/drugsatfda\\_docs/nda/2017/209092Orig1s000MultidisciplineR.pdf](https://www.accessdata.fda.gov/drugsatfda_docs/nda/2017/209092Orig1s000MultidisciplineR.pdf)
17. Study Of Letrozole With Or Without Palbociclib (PD-0332991) For The First-Line Treatment Of Hormone-Receptor Positive Advanced Breast Cancer - Study Results - ClinicalTrials.gov [Internet]. Clinical Trials.gov. 2018 [cited 2018 Jun 1]. Available from: <https://clinicaltrials.gov/ct2/show/results/NCT00721409?term=NCT00721409&rank=1&view=results#outcome1>
18. Finn RS, Martin M, Rugo HS, Jones S, Im S-A, Gelmon K, et al. Palbociclib and Letrozole in Advanced



Breast Cancer. *N Engl J Med.* 2016 Nov;375(20):1925–36.

19. Turner NC, Ro J, André F, Loi S, Verma S, Iwata H, et al. Palbociclib in Hormone-Receptor-Positive Advanced Breast Cancer. *N Engl J Med.* 2015 Jul;373(3):209–19.
20. Finn R, Hurvitz S, Allison M, Applebaum S, Glaspy J, DiCarlo B, et al. Phase I Study of PD 0332991, a Novel, Oral, Cyclin-D Kinase (CDK) 4/6 Inhibitor in Combination with Letrozole, for First-Line Treatment of Metastatic Post-Menopausal, Estrogen Receptor-Positive (ER+), Human Epidermal Growth Factor Receptor 2 (HER2)-Negati. *Cancer Res.* 2009;69(24 Suppl):Abstract nr 5069.
